# Supplementary material for: Rapid screening of photoactivatable metallodrugs: photonic crystal fibre microflow reactor coupled to ESI mass spectrometry
Source: Royal Society of Chemistry journal article supplement (doi:10.1039/c7ra06735f), 2017-01-01
Supplement: c7ra06735f1.pdf [file c7ra06735f1.pdf]

Supplementary Information

**Table S1** Possible structures for fragments of **1** and the products of its photodecomposition, as detected by MS.

| <i>m/z</i> | Formula                                                                               | Structure |
|------------|---------------------------------------------------------------------------------------|-----------|
| 372.0      | $[\{(\eta^6\text{-indane})\text{RuCl}\}_2(\mu\text{-}2,3\text{-dpp})]^{2+}$           |           |
| 888.96     | $[\{(\eta^6\text{-indane})\text{RuCl}\}_2(\mu\text{-}2,3\text{-dpp})](\text{PF}_6)^+$ |           |
| 489.01     | $[(\eta^6\text{-indane})\text{RuCl}(\mu\text{-}2,3\text{-dpp})]^+$                    |           |
| 276.99     | $[(\eta^6\text{-indane})\text{Ru}_2(\mu\text{-}2,3\text{-dpp})]^{2+}$                 |           |
| 227.04     | $[(\eta^6\text{-indane})\text{Ru}(\mu\text{-}2,3\text{-dpp})]^{2+}$                   |           |
